# Supplementary material for: Template-free, polymerase-free DNA polymerization
Source: Royal Society of Chemistry journal article supplement (doi:10.1039/b501132a), 2005-01-01
Supplement: b501132a.pdf [file b501132a.pdf]

## Template-Free, Polymerase-Free DNA Polymerization

Ye Tian and Chengde Mao\*

Purdue University, Department of Chemistry, 560 Oval Drive, West Lafayette, Indiana 47907, USA

### Supporting Information

#### Experimental Section

**DNA Oligonucleotides.** (a) DNA sequences were designed by a computer software, named "SEQUIN".<sup>1</sup> Primer: 5'-gCA TAC TgT CgT TCC TTT Tgg AAC gAC AgT ATg Cgg C-3'; Monomer: 5'-CAg gCC ggC TAA ATg ATT ATT TTT AAT CAT TTA gCC ggC CTg gCC-3'. All oligonucleotides were purchased from Integrated DNA Technologies, Inc., and purified by denaturing polyacrylamide gel electrophoresis.

**Radioactive isotope labeling.** A 20  $\mu$ l mixture solution of 1 pmole primer strand, 1  $\mu$ l of 2.2  $\mu$ M [ $\gamma$ -<sup>32</sup>P]ATP (10 mCi/mL), 3 units of polynucleotide T4 kinase (New England Biolabs, Inc., NEB) in a kination buffer, which contained 66 mM Tris-HCl, pH7.6, 6.6 mM MgCl<sub>2</sub>, and 10 mM dithiothreitol (DTT), was incubated for 2 hrs at 37°C. The reaction was stopped by heating the reaction mixture at 90°C for 5 minutes. Then the labeled DNA strand was purified by 20% denaturing polyacrylamide gel electrophoresis.

**Denaturing Polyacrylamide Gel Electrophoresis (PAGE).** Gels contained 20% polyacrylamide (19:1 acrylamide/bisacrylamide) and 8.3 M urea; they were run at 55°C. The running buffer is a Tris-Borate-EDTA buffer (TBE), which consisted of 89 mM Tris buffer (pH 8.0), 89 mM boric acid, and 2 mM ethylene diamine tetraacetic acid (EDTA). Gels were run on a Hoefer SE 600 electrophoresis unit at 600 V (constant voltage).

**Native PAGE.** Gels contained 8% polyacrylamide (19:1 acrylamide/bisacrylamide) and were run on a FB-VE10-1 electrophoresis unit (Fisher Biotech) at 22°C (80 V, constant voltage). After electrophoresis, the gels were exposed and scanned by a PhosporImager (Packard).. TBE buffer were used for electrophoresis.

**DNA polymerization.** Primer and monomer strands at designated ratios were dissolved in 30  $\mu$ l NEB Buffer 3 (containing 100 mM NaCl, 50 mM Tris-HCl, pH 7.9, 10 mM MgCl<sub>2</sub>, 1mM DTT), to which the ATP concentration was brought to 1 mM. The final primer concentration is 0.1  $\mu$ M. Polymerization is initiated by addition of 1,200 units of T4 polynucleotide ligase (NEB) and 30 units of Bgl I (NEB). At different incubation time, an aliquot of 3  $\mu$ L of the reaction mixture was withdrawn, mixed with 7  $\mu$ L stopping buffer (20 mM EDTA in formamide), and quenched to dry ice, and then analyzed by native PAGE.

#### Reference

1. Seeman, N. C. *J. Biomol. Struct. Dyn.* **1990**, *8*, 573.
